# Supplementary material
Source: publisher figshare collection journal article supplement (https://sage.figshare.com/ndownloader/files/14375843)
Supplement: Supplementary file 1 [file 14375843]

## Effects of Abdominal Aortic Aneurysm Size on Mid- and Long-term Mortality After Endovascular Aneurysm Repair

Haekyung Jeon-Slaughter et al. *J Endovasc Ther.* 2019;26(2).

**Supplemental Figure 1.** Receiver operating characteristics analysis discriminating between death and survival at 10 years as a function of age.

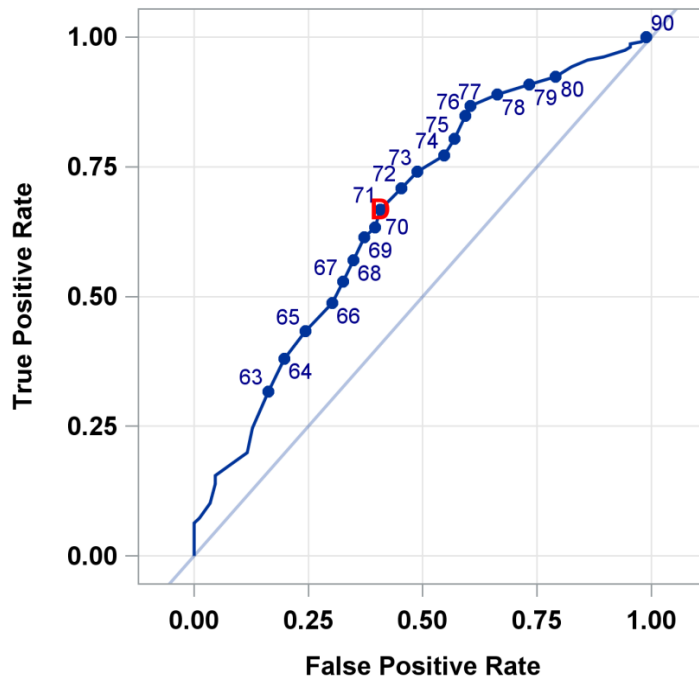

# Effects of Abdominal Aortic Aneurysm Size on Mid- and Long-term Mortality After Endovascular Aneurysm Repair

Haekyung Jeon-Slaughter et al. *J Endovasc Ther.* 2019;26(2).

**Supplementary Table 1.** Causes of Deaths by Years of Follow-up.

|           | 3 Years (n=72) | 5 Years<br>(n=105: 72+33) | 10 Years<br>(n=134: 72+33+29) |
|-----------|----------------|---------------------------|-------------------------------|
| Cancer    | 9              | 18 (9+9)                  | 23 (9+9+5)                    |
| Cardiac   | 8              | 14 (8+6)                  | 15 (8+6+1)                    |
| Pulmonary | 0              | 2 (0+2)                   | 6 (0+2+4)                     |
| Renal     | 1              | 2 (1+1)                   | 3 (1+1+1)                     |
| Other     | 8              | 17 (12+2)                 | 21 (12+2+4)                   |
| Unknown   | 46             | 63 (46+13)                | 73 (46+13+14)                 |

<sup>a</sup>The counts are cumulative. The numbers in parentheses are new deaths in each time period (3–5 years and 5–10 years).

## Effects of Abdominal Aortic Aneurysm Size on Mid- and Long-term Mortality After Endovascular Aneurysm Repair

Haekyung Jeon-Slaughter et al. *J Endovasc Ther.* 2019;26(2).

**Supplemental Table 2.** Baseline Patient and Clinical Characteristics Stratified by Abdominal Aortic Aneurysm Size  $\geq 5.5$  or  $< 5.5$  cm.<sup>a</sup>

| Characteristics   | All (n=325)    | AAA $\geq 5.5$ cm (n=160) | AAA $< 5.5$ cm (n=165) | p <sup>b</sup> |
|-------------------|----------------|---------------------------|------------------------|----------------|
| Age, y            | 69.7 $\pm$ 8.5 | 71.1 $\pm$ 9.0            | 68.3 $\pm$ 7.8         | 0.004          |
| Men               | 323 (99.4)     | 159 (99.4)                | 164 (99.4)             | 0.983          |
| Active smoker     | 168 (51.7)     | 84 (52.5)                 | 84 (50.9)              | 0.775          |
| CAD               | 153 (47.1)     | 72 (45.0)                 | 81 (49.1)              | 0.461          |
| COPD              | 95 (29.2)      | 41 (25.6)                 | 54 (32.7)              | 0.160          |
| DM                | 70 (21.5)      | 35 (21.9)                 | 35 (21.2)              | 0.885          |
| Hypertension      | 264 (81.2)     | 127 (79.4)                | 137 (83.0)             | 0.400          |
| Symptomatic       | 17 (3.1)       | 5 (3.1)                   | 12 (7.3)               | 0.094          |
| Creatinine, mg/dL | 1.2 $\pm$ 0.7  | 1.3 $\pm$ 0.9             | 1.1 $\pm$ 0.4          | 0.443          |

Abbreviations: AAA, abdominal aortic aneurysm; CAD, coronary artery disease; COPD, chronic obstructive pulmonary disease; DM, diabetes mellitus.

<sup>a</sup>Continuous data are presented as the mean  $\pm$  standard deviation; categorical data are given as the number (percentage).

<sup>b</sup>The 2-sided Wilcoxon rank sum test was used to test AAA size group differences for continuous variables and the Cochran-Mantel-Haenszel test for binary variables.

**Effects of Abdominal Aortic Aneurysm Size on Mid- and Long-term Mortality After Endovascular Aneurysm Repair** Haekyung Jeon-Slaughter et al. *J Endovasc Ther.* 2019;26(2).

**Supplemental Table 3.** Unadjusted and Adjusted Hazard Ratios for 3-, 5-, and 10-Year Mortality After Endovascular Aneurysm Repair in Patients With Abdominal Aortic Aneurysm  $\geq 5.5$  vs  $< 5.5$  cm.

|                        | 3-Year Mortality |              |           | 5-Year Mortality |              |           | 10-Year Mortality |              |           |
|------------------------|------------------|--------------|-----------|------------------|--------------|-----------|-------------------|--------------|-----------|
|                        | HR               | 95% CI       | p         | HR               | 95% CI       | p         | HR                | 95% CI       | p         |
| Unadjusted             |                  |              |           |                  |              |           |                   |              |           |
| AAA size $\geq 5.5$ cm | 1.58             | 0.99 to 2.54 | 0.056     | 1.46             | 0.99 to 2.15 | 0.055     | 1.29              | 0.92 to 1.81 | 0.141     |
| Adjusted               |                  |              |           |                  |              |           |                   |              |           |
| AAA size $\geq 5.5$ cm | 1.53             | 0.93 to 2.51 | 0.093     | 1.29             | 0.86 to 1.94 | 0.220     | 1.18              | 0.83 to 1.68 | 0.358     |
| Age $> 70$ years       | 2.80             | 1.56 to 5.02 | $< 0.001$ | 2.25             | 1.42 to 3.57 | $< 0.001$ | 2.09              | 1.40 to 3.11 | $< 0.001$ |
| Current smoker         | 1.31             | 0.78 to 2.21 | 0.301     | 1.13             | 0.73 to 1.77 | 0.582     | 1.04              | 0.70 to 1.54 | 0.864     |
| CAD                    | 1.22             | 0.74 to 2.02 | 0.605     | 1.04             | 0.69 to 1.57 | 0.864     | 1.05              | 0.74 to 1.51 | 0.777     |
| COPD                   | 1.40             | 0.84 to 2.31 | 0.195     | 1.29             | 0.84 to 1.98 | 0.249     | 1.44              | 0.99 to 2.10 | 0.056     |
| DM                     | 0.87             | 0.48 to 1.60 | 0.195     | 1.00             | 0.62 to 1.62 | 0.997     | 1.18              | 0.79 to 1.77 | 0.428     |
| Hypertension           | 0.77             | 0.44 to 1.34 | 0.356     | 0.85             | 0.53 to 1.39 | 0.521     | 0.94              | 0.60 to 1.47 | 0.774     |
| Symptomatic            | 2.53             | 1.14 to 5.59 | 0.022     | 2.02             | 0.90 to 4.52 | 0.087     | 1.56              | 0.69 to 2.54 | 0.283     |
| Creatinine, mg/dL      | 1.01             | 0.73 to 1.41 | 0.949     | 1.25             | 1.04 to 1.50 | 0.018     | 1.23              | 1.01 to 1.48 | 0.039     |

Abbreviations: AAA, abdominal aortic aneurysm; CAD, coronary artery disease; CI, confidence interval; COPD, chronic obstructive pulmonary disease; DM, diabetes mellitus; HR, hazard ratio.

## Effects of Abdominal Aortic Aneurysm Size on Mid- and Long-term Mortality After Endovascular Aneurysm Repair

Haekyung Jeon-Slaughter et al. *J Endovasc Ther.* 2019;26(2).

**Supplemental Table 4.** Baseline Patient and Clinical Characteristics Stratified by Abdominal Aortic Aneurysm Size  $\geq 6.0$  or  $>6.0$  cm.<sup>a</sup>

| Characteristics   | All<br>(n=325) | AAA $\geq 6.0$<br>cm (n=95) | AAA $<6.0$ cm<br>(n=230) | p <sup>b</sup> |
|-------------------|----------------|-----------------------------|--------------------------|----------------|
| Age, y            | 69.7 $\pm$ 8.5 | 71.3 $\pm$ 9.2              | 68.9 $\pm$ 8.2           | 0.047          |
| Men               | 323 (99.4)     | 94 (98.9)                   | 229 (99.6)               | 0.518          |
| Active smoker     | 168 (51.7)     | 54 (56.8)                   | 114 (49.6)               | 0.233          |
| CAD               | 153 (47.1)     | 37 (39.0)                   | 116 (49.1)               | 0.060          |
| COPD              | 95 (29.2)      | 25 (26.3)                   | 70 (30.4)                | 0.458          |
| DM                | 70 (21.5)      | 17 (17.9)                   | 53 (23.0)                | 0.305          |
| Hypertension      | 264 (81.2)     | 75 (78.9)                   | 189 (82.2)               | 0.499          |
| Symptomatic       | 17 (3.1)       | 5 (5.3)                     | 12 (5.2)                 | 0.987          |
| Creatinine, mg/dL | 1.2 $\pm$ 0.7  | 1.3 $\pm$ 1.0               | 1.2 $\pm$ 0.5            | 0.329          |

Abbreviations: AAA, abdominal aortic aneurysm; CAD, coronary artery disease; COPD, chronic obstructive pulmonary disease; DM, diabetes mellitus.

<sup>a</sup>Continuous data are presented as the mean  $\pm$  standard deviation; categorical data are given as the number (percentage).

<sup>b</sup>The 2-sided Wilcoxon rank sum test was used to test AAA size group differences for continuous variables and the Cochran-Mantel-Haenszel test for binary variables.

**Effects of Abdominal Aortic Aneurysm Size on Mid- and Long-term Mortality After Endovascular Aneurysm Repair** Haekyung Jeon-Slaughter et al. *J Endovasc Ther.* 2019;26(2).

**Supplemental Table 5.** Adjusted Hazard Ratios for 3-Year, 5-Year, and 10-Year Mortality After EVAR Between AAA Size  $\geq 6.0$  cm and  $< 6.0$  cm.

|                        | 3-Year Mortality |              |           | 5-Year Mortality |              |           | 10-Year Mortality |              |           |
|------------------------|------------------|--------------|-----------|------------------|--------------|-----------|-------------------|--------------|-----------|
|                        | HR               | 95% CI       | p         | HR               | 95% CI       | p         | HR                | 95% CI       | p         |
| AAA size $\geq 6.0$ cm | 1.69             | 0.99 to 2.68 | 0.042     | 1.39             | 0.90 to 2.14 | 0.139     | 1.33              | 0.91 to 1.94 | 0.149     |
| Age $> 70$ years       | 2.77             | 1.54 to 4.99 | $< 0.001$ | 2.26             | 1.42 to 3.59 | $< 0.001$ | 2.07              | 1.39 to 3.09 | $< 0.001$ |
| Current smoker         | 1.28             | 0.76 to 2.15 | 0.836     | 1.13             | 0.72 to 1.76 | 0.600     | 1.02              | 0.69 to 1.52 | 0.907     |
| CAD                    | 1.25             | 0.76 to 2.07 | 0.383     | 1.06             | 0.70 to 1.60 | 0.789     | 1.08              | 0.75 to 1.56 | 0.669     |
| COPD                   | 1.38             | 0.84 to 2.28 | 0.202     | 1.29             | 0.84 to 1.97 | 0.247     | 1.44              | 0.99 to 2.09 | 0.054     |
| DM                     | 0.90             | 0.49 to 1.65 | 0.732     | 0.89             | 0.53 to 1.51 | 0.960     | 1.19              | 0.79 to 1.79 | 0.400     |
| Hypertension           | 0.77             | 0.44 to 1.36 | 0.806     | 0.90             | 0.54 to 1.49 | 0.547     | 0.94              | 0.60 to 1.48 | 0.780     |
| Symptomatic            | 2.29             | 1.02 to 5.13 | 0.045     | 1.69             | 0.71 to 4.06 | 0.127     | 1.49              | 0.65 to 3.40 | 0.345     |
| Creatinine, mg/dL      | 0.99             | 0.72 to 1.37 | 0.977     | 1.25             | 1.04 to 1.50 | 0.015     | 1.22              | 1.02 to 1.47 | 0.023     |

Abbreviations: AAA, abdominal aortic aneurysm; CAD, coronary artery disease; CI, confidence interval; COPD, chronic obstructive pulmonary disease; DM, diabetes mellitus; HR, hazard ratio.
